# Supplementary material
Source: Research Square preprint supplement (doi:10.21203/rs.3.rs-10427133/v1)
Supplement: Supplementary file 1 [file 7f13ca086499ad4d7dcb1836.docx]

**Supplemental Document Of**

**Risk factor analysis and predictive model construction of fractional uric acid excretion in Chinese inpatients with Type 2 Diabetes**

**Contents**

1. Table S1 Good-of-fitness indices for one-fold, five-fold, ten-fold validation analysis in training dataset

2. Table S2 Comparison of indices between observed and predicted FEUA and predictive indices on elevated FEUA for full dataset and four subgroups

3. Table S3 Overall characteristics of external validation dataset stratified by FEUA elevation

4. Table S4 Resemblance between the observed FEUA and predicted FEUA in external dataset

5. Table S5 Comparison of good-of-fitness indices calculated based on predicted FEUA between full external dataset and its five subgroups

6. Figure S1 Six plots describing the residuals of final regression model

7. Figure S2 Six plots comparing observed FEUA (elevated FEUA) and predicted FEUA in external dataset

8. Datasets of modeling and validation （See attachments）

1. Table S1 Good-of-fitness indices for one-fold, five-fold, ten-fold validation analysis in training dataset

|  |  | Indices from Modeling | |  |  |  |  | Indices between observed and predicted FEUA | | | | |  | Predictive Indices on elevated FEUA | | | |  |
| --- | --- | --- | --- | --- | --- | --- | --- | --- | --- | --- | --- | --- | --- | --- | --- | --- | --- | --- |
| Folds | N | R2 | Adj-R2 | RMSE* | AIC | BIC |  | N | RMSE | MAE | Spearman correlation coefficient | Determination coefficient |  | Correct classification rate for FEUA≥11 | Correct classification rate at cut-point 0.5 | ROC | Lower-  bound | Upper-  bound |
| 1 Fold | 1510 | 0.6359 | 0.6349 | 0.223 | -241.58 | -214.9807 |  | 1510 | 1.6841 | 1.1856 | 0.7870 | 0.6436 |  | 0.9470 | 0.9483 | 0.9552 | 0.9413 | 0.9691 |
| 5 Fold | 1201 | 0.6459 | 0.6447 | 0.2206 | -216.9009 | -191.4463 |  | 309 | 1.8140 | 1.2665 | 0.7588 | 0.5780 |  | 0.9417 | 0.9385 | 0.9520 | 0.9133 | 0.9907 |
|  | 1213 | 0.6421 | 0.6409 | 0.2220 | -203.6962 | -178.1919 |  | 297 | 1.5651 | 1.1745 | 0.7743 | 0.6578 |  | 0.9562 | 0.9360 | 0.9295 | 0.8843 | 0.9747 |
|  | 1218 | 0.6323 | 0.6311 | 0.2240 | -183.2918 | -157.767\0 |  | 292 | 1.9744 | 1.1810 | 0.8234 | 0.6505 |  | 0.9349 | 0.9349 | 0.9543 | 0.9272 | 0.9814 |
|  | 1183 | 0.6313 | 0.6310 | 0.2218 | -201.1649 | -175.7858 |  | 327 | 1.6546 | 1.2316 | 0.7874 | 0.6877 |  | 0.9480 | 0.9541 | 0.9747 | 0.9573 | 0.9921 |
|  | 1225 | 0.6300 | 0.6288 | 0.2262 | -159.692 | -134.1385 |  | 285 | 1.5109 | 1.1022 | 0.7929 | 0.7153 |  | 0.9649 | 0.9684 | 0.9575 | 0.9182 | 0.9968 |
| 10 Fold | 1355 | 0.6400 | 0.6390 | 0.2222 | -226.0307 | -199.9729 |  | 155 | 1.8851 | 1.2138 | 0.7662 | 0.5874 |  | 0.9613 | 0.9548 | 0.9817 | 0.9619 | 0.9999 |
|  | 1356 | 0.6405 | 0.6395 | 0.2217 | -232.0234 | -205.9619 |  | 154 | 1.7171 | 1.3060 | 0.7558 | 0.5811 |  | 0.9221 | 0.9221 | 0.9231 | 0.8545 | 0.9918 |
|  | 1358 | 0.6475 | 0.6465 | 0.2212 | -238.8071 | -212.7383 |  | 152 | 1.5899 | 1.1433 | 0.7296 | 0.5145 |  | 0.9474 | 0.9605 | 0.8889 | 0.8107 | 0.9671 |
|  | 1365 | 0.6296 | 0.6285 | 0.2240 | -206.3442 | -180.2496 |  | 145 | 1.5436 | 1.2098 | 0.8255 | 0.7559 |  | 0.9586 | 0.9655 | 0.9653 | 0.9279 | 0.9999 |
|  | 1354 | 0.6420 | 0.641 | 0.2219 | -229.2877 | -203.2336 |  | 156 | 1.4356 | 1.1213 | 0.7893 | 0.6066 |  | 0.9551 | 0.9487 | 0.9552 | 0.9200 | 0.9905 |
|  | 1374 | 0.6264 | 0.6253 | 0.2249 | -195.633 | -169.5056 |  | 136 | 2.4165 | 1.2485 | 0.8597 | 0.6993 |  | 0.9118 | 0.9338 | 0.9510 | 0.9101 | 0.9918 |
|  | 1348 | 0.6333 | 0.6322 | 0.2215 | 233.3263 | -207.2944 |  | 162 | 1.7969 | 1.3347 | 0.7758 | 0.6959 |  | 0.9383 | 0.9568 | 0.9771 | 0.9531 | 0.9999 |
|  | 1345 | 0.6344 | 0.6333 | 0.2234 | -209.3675 | -183.3467 |  | 165 | 1.4999 | 1.1306 | 0.7934 | 0.6656 |  | 0.9576 | 0.9576 | 0.9734 | 0.9492 | 0.9977 |
|  | 1350 | 0.6391 | 0.6380 | 0.2235 | -208.8795 | -182.8402 |  | 160 | 1.5644 | 1.0971 | 0.7431 | 0.6840 |  | 0.9813 | 0.9813 | 0.9903 | 0.9739 | 0.9999 |
|  | 1385 | 0.6277 | 0.6266 | 0.2252 | 193.4222 | -167.2549 |  | 125 | 1.4514 | 1.1189 | 0.8382 | 0.7424 |  | 0.9440 | 0.9600 | 0.9287 | 0.8596 | 0.9978 |
| Leave-  one-out | - | - | - | - | - | - |  | 1510 | 1.7081 | 1.1914 | 0.7858 | 0.6348 |  | 0.9464 | 0.9483 | 0.9547 | 0.94065 | 0.96874 |

*Duan’s Smearing Factors 1 Fold:1.0265; 5Fold: 1.0267 1.0265 1.0266 1.0264 1.0264; 10 Fold: 1.0267 1.0265 1.0265 1.0264 1.0265 1.0266 1.0265 1.0264 1.0265 1.0265

2. Table S2 Comparison of indices between observed and predicted FEUA and predictive indices on elevated FEUA for full dataset and four subgroups

|  |  | Indices between observed and predicted FEUA | | | | |  |  | Predictive Indices on elevated FEUA | | | |  |  |  |  |  |  |
| --- | --- | --- | --- | --- | --- | --- | --- | --- | --- | --- | --- | --- | --- | --- | --- | --- | --- | --- |
| Group | N | RMSE* | MAE | Spearman r | *P* value | Determination Coefficient | *P* value |  | Correct classification rate for FEUA≥11 | Correct classification rate at cut-point 0.5 | ROC | Lower-  bound | Upper-  bound | Youden index | Cut-  point | Sensitivity at cut-point | Specificity at cut-point | ROC at cut-point |
| Full sample size | 1510 | 1.6841 | 1.1856 | 0.7870 | <0.001 | 0.6436 | <0.001 |  | 0.9470 | 0.9483 | 0.9552 | 0.9413 | 0.9691 | 0.7814 | 7.8186 | 0.9541 | 0.8273 | 0.8907 |
| Diabetic patients with UACR>=30 or eGFR<60 | 360 | 2.0431 | 1.4403 | 0.7761 | <0.001 | 0.6842 | <0.001 |  | 0.9306 | 0.9278 | 0.9561 | 0.9326 | 0.9796 | 0.7922 | 9.3142 | 0.8837 | 0.9085 | 0.8961 |
| Diabetic patients without UACR>=30 or eGFR<60 | 1150 | 1.4573 | 1.0838 | 0.7629 | <0.001 | 0.6566 | <0.001 |  | 0.9565 | 0.9574 | 0.9524 | 0.9347 | 0.9701 | 0.7944 | 7.9605 | 0.9697 | 0.8247 | 0.8972 |
| Diabetic patients with FPG<10mmol/L | 1202 | 1.6357 | 1.1409 | 0.7995 | <0.001 | 0.6393 | <0.001 |  | 0.9559 | 0.9567 | 0.9567 | 0.9407 | 0.9728 | 0.7980 | 7.9605 | 0.9605 | 0.8375 | 0.8990 |
| Diabetic patients with FPG>=10mmol/L | 308 | 1.808/3 | 1.3322 | 0.8014 | <0.001 | 0.6700 | <0.001 |  | 0.9058 | 0.9058 | 0.9459 | 0.9152 | 0.9766 | 0.8182 | 9.1244 | 0.9091 | 0.9091 | 0.9091 |

*Duan’s Smearing Factors for each group:1.0265 1.0265 1.0275 1.0267 1.0271

3. Table S3 Overall characteristics of external validation dataset stratified by FEUA elevation ([xˉ ±s；n(%)];n=791)

| variables | overall (N=791) | low FEUA (N=732) | high FEUA (N=59) | t/z | P | OR | 95%CI |
| --- | --- | --- | --- | --- | --- | --- | --- |
| Female (n, %) | 367 (46.40%) | 333(45.49%) | 34(57.63%) | 1.78 | 0.074 | 1.63 | 0.953-2.786 |
| Age (years) | 54.91 ± 15.38 | 54.27 ± 15.39 | 62.88 ± 12.96 | 4.07 | <0.001 | 1.043 | 1.022-1.064 |
| Diabetes duration (years) | 10.00 (4.00, 15.00) | 9.88 (4.00, 15.00) | 10.52 (6.00, 17.00) | 2.08 a | 0.038 a | 1.031 | 1.002-1.061 |
| BMI | 26.70 ± 4.78 | 26.78 ± 4.88 | 25.72 ± 3.12 | -1.65 | 0.099 | 0.946 | 0.885-1.010 |
| SBP (mmHg) | 135.08 ± 18.41 | 134.89 ± 18.32 | 137.37 ± 19.54 | 1 | 0.32 | 1.007 | 0.993-1.021 |
| DBP (mmHg) | 77.12 ± 11.69 | 77.39 ± 11.64 | 73.85 ± 11.88 | -2.23 | 0.025 | 0.973 | 0.950-0.997 |
| UACR (mg/g) | 13.10 (4.56, 114.41) | 11.93 (4.55, 98.11) | 52.71 (4.61, 348.88) | 1.95 a | 0.051 a | 1.003 | 1.002-1.004 |
| eGFR(ml/min/1.73m2) | 100.35 ± 20.08 | 101.29 ± 19.76 | 88.66 ± 20.50 | -4.6 | <0.001 | 0.969 | 0.956-0.982 |
| SUA (μmol/L) | 345.78 ± 84.19 | 354.15 ± 79.54 | 241.95 ± 70.46 | -8.76 | <0.001 | 0.979 | 0.974-0.983 |
| Male | 367.24 ± 81.97 | 374.28 ± 77.67 | 254.87 ± 66.57 | -6.06 | <0.001 | 0.974 | 0.966-0.983 |
| Female | 321.00 ± 79.90 | 330.04 ± 75.02 | 232.46 ± 72.68 | -6.13 | <0.001 | 0.98 | 0.974-0.986 |
| UUA(μmol/L) | 3.54 ± 1.05 | 3.52 ± 1.03 | 3.82 ± 1.28 | 2.14 | 0.032 | 1.282 | 1.021-1.610 |
| SCr (μmol/L) | 64.81 ± 18.55 | 64.33 ± 17.89 | 70.78 ± 24.77 | 2.54 | 0.011 | 1.016 | 1.004-1.029 |
| uCr (μmol/L) | 10.39 ± 2.99 | 10.57 ± 2.92 | 8.20 ± 3.11 | -5.74 | <0.001 | 0.722 | 0.646-0.807 |
| FEUA (%) | 6.93 ± 3.20 | 6.31 ± 1.98 | 14.58 ± 5.06 | - | - | - | - |
| ALT (U/L) | 24.00 (15.00, 36.00) | 24.00 (15.00, 36.06) | 24.00 (15.00, 32.49) | -1.33 a | 0.185 a | 0.989 | 0.972-1.005 |
| AST (U/L) | 19.98 (11.98, 30.92) | 19.88 (11.77, 30.71) | 22.00 (15.11, 31.63) | 1.09 a | 0.277 a | 1.005 | 0.996-1.015 |
| FPG (mmol/l) | 7.96 ± 2.12 | 7.92 ± 2.13 | 8.39 ± 2.01 | 1.63 | 0.103 | 1.096 | 0.982-1.224 |
| HbA1c(%) | 8.71 ± 1.88 | 8.70 ± 1.87 | 8.95 ± 2.04 | 1.01 | 0.313 | 1.07 | 0.938-1.222 |
| HDL-C (mmol/L) | 1.05 ± 0.26 | 1.05 ± 0.26 | 1.05 ± 0.24 | -0.07 | 0.944 | 0.964 | 0.341-2.723 |
| Male | 0.97 ± 0.23 | 0.97 ± 0.23 | 0.99 ± 0.27 | 0.38 | 0.704 | 1.392 | 0.254-7.628 |
| Female | 1.14 ± 0.26 | 1.15 ± 0.26 | 1.09 ± 0.20 | -1.18 | 0.238 | 0.403 | 0.089-1.825 |
| LDL-C (mmol/L) | 2.82 ± 0.86 | 2.82 ± 0.86 | 2.79 ± 0.88 | -0.22 | 0.824 | 0.965 | 0.707-1.318 |
| TC (mmol/L) | 4.51 ± 0.85 | 4.52 ± 0.86 | 4.32 ± 0.71 | -1.8 | 0.072 | 0.738 | 0.529-1.028 |
| TG (mmol/L) | 1.67 (1.20, 2.43) | 1.68 (1.20, 2.46) | 1.45 (1.21, 1.98) | -1.89 a | 0.058 a a | 0.765 | 0.579-1.010 |
| hsCRP (mg/L) | 2.24 (0.92, 5.25) | 2.25 (0.91, 5.22) | 2.16 (1.02, 5.59) | 0.21 a | 0.835 a | 1.002 | 0.984-1.020 |
| Urinary β2-MG (μg/mL) | 259.08 (60.00, 714.86) | 243.87 (50.00, 650.84) | 669.63 (225.70, 1266.64) | 4.38 a | <0.001 a | 1.003 | 1.002-1.004 |
| Gout (n, %) | 125 (15.80%) | 119(16.26%) | 6(10.17%) | -1.22 | 0.223 | 0.583 | 0.245-1.387 |
| DR (n, %) | 59 (7.46%) | 52(7.10%) | 7(11.86%) | 1.32 | 0.186 | 1.76 | 0.762-4.069 |
| DPN (n, %) | 51 (6.45%) | 50(6.83%) | 1(1.69%) | -1.42 | 0.156 | 0.235 | 0.032-1.733 |
| Hypertension (n, %) | 506 (63.97%) | 464(63.39%) | 42(71.19%) | 1.2 | 0.232 | 1.427 | 0.796-2.557 |
| CHD (n, %) | 303 (38.31%) | 286 (39.07%) | 24 (40.68%) | -1.17 | 0.183 | 0.686 | 0.159-1.213 |
| Fatty liver (n, %) | 278 (35.15%) | 259(35.38%) | 19(32.20%) | -0.49 | 0.623 | 0.867 | 0.492-1.529 |

a: The probability and odd ratio obtained by taking the natural logarithm of the independent variable

Abbreviations: FEUA: fractional excretion of uric acid; BMI: body mass index; SBP: systolic blood pressure; DBP: diastolic blood pressure; UUA: urinary uric acid; uCr: urinary creatinine; SUA: serum uric acid; sCr: serum Creatinine; UACR: urinary uric acid to creatinine ratio; eGFR: estimated glomerular filtration rate; HDL-C: high density lipid protein cholesterol; LDL-C: low density lipid protein cholesterol; TG: triglyceride; TC: total cholesterol; FPG: fasting plasma glucose; HbA1c: Hemoglobin A1c; ALT: alanine aminotransferase; AST: aspartate aminotransferase; hsCRP: high-sensitive C reactive protein; β2MG: β2-microglobulin; DR: diabetic retinopathy; DPN: diabetic peripheral nerve disease; CHD: coronary heart disease.

4. Table S4 Resemblance between the observed FEUA and predicted FEUA in external dataset

|  |  | Observed FEUA |  |  |  |  | Predicted FEUA |  |  |  |
| --- | --- | --- | --- | --- | --- | --- | --- | --- | --- | --- |
| Group | N | Mean | Standard deviation | Minimum | Maximum |  | Mean | Standard deviation | Minimum | Maximum |
| Full dataset | 791 | 6.9281 | 3.1977 | 0.8472 | 33.4766 |  | 6.9679 | 2.1738 | 2.3165 | 33.4043 |
| 2017 | 406 | 7.1535 | 3.4661 | 1.4888 | 33.4766 |  | 7.0824 | 2.4636 | 2.6088 | 33.4043 |
| 2025 | 385 | 6.6903 | 2.8732 | 0.8472 | 30.1410 |  | 6.8471 | 1.8144 | 2.3165 | 16.1432 |
| Split1 | 262 | 6.9930 | 3.5725 | 1.4889 | 33.4766 |  | 7.0430 | 2.0124 | 3.0663 | 16.1432 |
| Split2 | 276 | 6.7526 | 3.1828 | 0.8472 | 33.3203 |  | 6.6857 | 2.5137 | 2.3165 | 32.4043 |
| Split3 | 253 | 7.0523 | 2.7800 | 1.4586 | 23.9323 |  | 7.0114 | 1.9243 | 2.7343 | 16.7231 |

Abbreviation: FEUA: fractional excretion of uric acid

5. Table S5 Comparison of indices between observed and predicted FEUA and predictive indices on elevated FEUA for full external dataset and four subgroups

| Group | N | RMSE | MAE | Spearman  Correlation  Coefficient | *P* value | Determination  Coefficient | *P* value |  |  | Correct  classification  rate for  FEUA≥11 | Correct  classification  rate at  cut-point 0.5 | ROC | Upper-  bound | Lower-  bound |
| --- | --- | --- | --- | --- | --- | --- | --- | --- | --- | --- | --- | --- | --- | --- |
| Full dataset | 791 | 2.1664 | 1.3680 | 0.7451 | <0.001 | 0.5439 | <0.001 |  |  | 0.9418 | 0.9418 | 0.8946 | 0.8545 | 0.9347 |
| 2017 | 406 | 2.3187 | 1.3760 | 0.7611 | <0.001 | 0.5529 | <0.001 |  |  | 0.9409 | 0.9409 | 0.9223 | 0.8743 | 0.9703 |
| 2025 | 385 | 1.9931 | 1.3596 | 0.7297 | <0.001 | 0.5300 | <0.001 |  |  | 0.9429 | 0.9455 | 0.8562 | 0.7900 | 0.9224 |
| Split1 | 262 | 2.6328 | 1.4799 | 0.7302 | <0.001 | 0.4699 | <0.001 |  |  | 0.9504 | 0.9466 | 0.8747 | 0.7795 | 0.9698 |
| Split2 | 276 | 2.0640 | 1.4130 | 0.7114 | <0.001 | 0.5798 | <0.001 |  |  | 0.9348 | 0.9348 | 0.9037 | 0.8497 | 0.9578 |
| Split3 | 253 | 1.6874 | 1.2031 | 0.7908 | <0.001 | 0.6423 | <0.001 |  |  | 0.9407 | 0.9486 | 0.9071 | 0.8407 | 0.9735 |


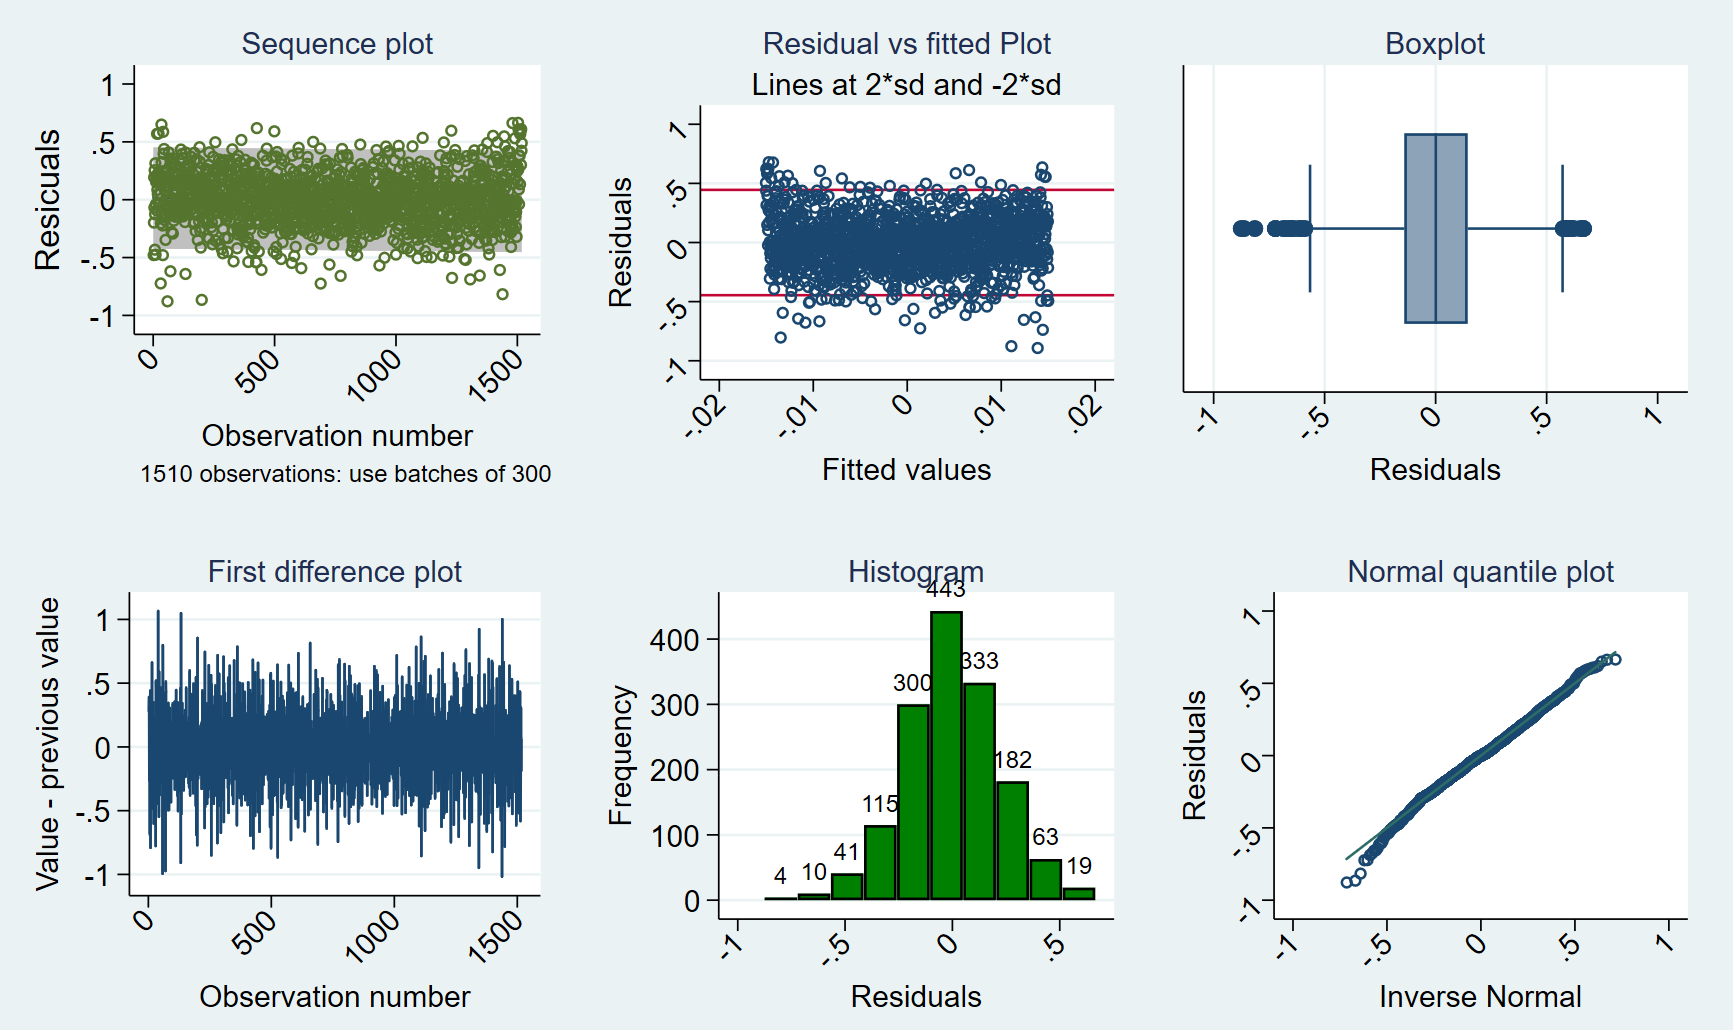


Figure S1 Six plots describing the residuals of final regression model

6. Figure S1 showed that the majority of the scatter points were around the mean of the residuals within the range of -0.5 to +0.5. No outliers were identified. Both the histogram and the Normal Quantile plot indicated a distribution of normality. All the diagnostic indices showed a normality of distribution and a wellness of modeling construction.


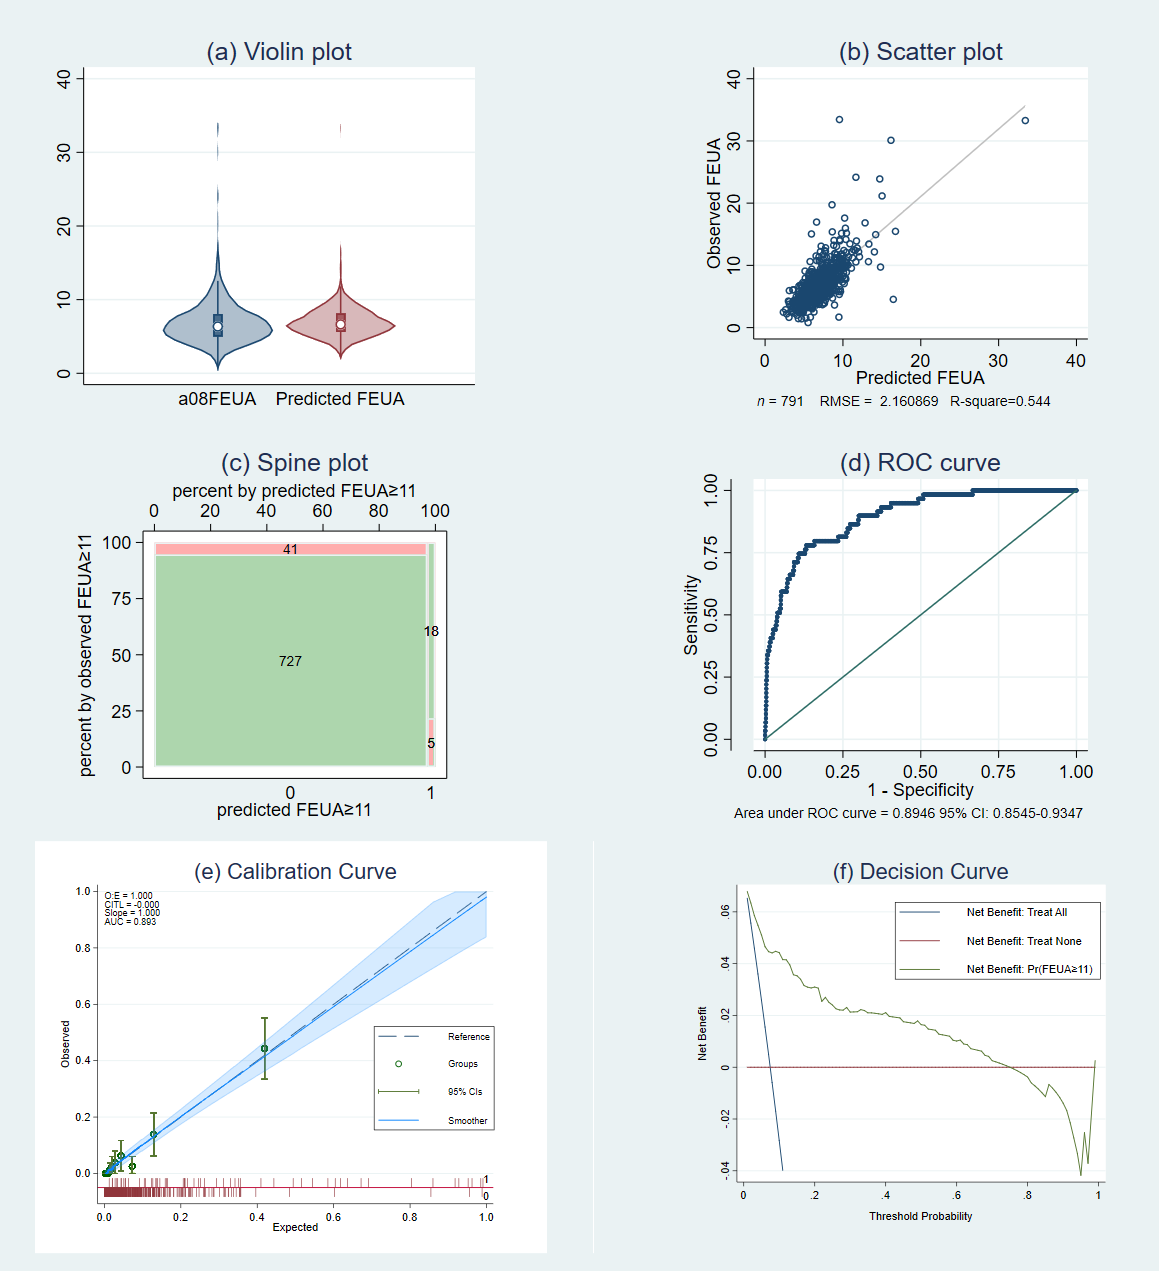


7. Figure S2 Six plots comparing observed FEUA (elevated FEUA) and predicted FEUA in external dataset
